# Supplementary material for: Genomic Prediction in Local Breeds: The Rendena Cattle as a Case Study
Source: MDPI journal article supplement (doi:10.3390/ani11061815), 2021-06-18
Supplement: s1 [file s1]

**Supplementary Material 1.** Value of accuracy, dispersion, and bias divided by the genetic standard deviations (bias\_std) for average daily gain. Models presented are Pedigree BLUP (PBLUP), single-step genomic BLUP (ssGBLUP), and different weighting single step, described as follows: non\_linear refers to the nonlinear weighting strategies presented in the manuscript with the respective CT value, limit\_5 refers to when variance was set up to a maximum of 5, quadratic refers to the quadratic weight applied to the SNP solutions, and sliding stands for the quadratic weight applied to a window of sliding SNPs. iter stands for the number of iterations, and NA values mean that it was not possible to obtain the solution due to a blending problem between  $A^{-1}$  and  $G^{-1}$ .

| Models                                    | Accuracy | Dispersion | Bias_std |
|-------------------------------------------|----------|------------|----------|
| Pblup                                     | 0.366    | 1.140      | -0.04    |
| ssGBLUP                                   | 0.471    | 1.046      | 0.01     |
| non_linear_1.105/iter_1                   | 0.551    | 1.183      | 0.00     |
| non_linear_1.105/iter_2                   | 0.552    | 1.239      | 0.01     |
| non_linear_1.105/iter_3                   | 0.552    | 1.245      | 0.02     |
| non_linear_1.105/iter_4                   | 0.552    | 1.246      | 0.02     |
| non_linear_1.105/iter_5                   | 0.552    | 1.246      | 0.02     |
| non_linear_1.105/iter_6                   | 0.553    | 1.246      | 0.02     |
| non_linear_1.105/iter_7                   | 0.553    | 1.246      | 0.02     |
| non_linear_1.105/iter_8                   | 0.553    | 1.246      | 0.02     |
| non_linear_1.105/iter_9                   | 0.552    | 1.246      | 0.02     |
| non_linear_1.105/iter_10                  | 0.552    | 1.235      | 0.02     |
| non_linear_1.105_variance_limit_5/iter_1  | 0.551    | 1.183      | 0.00     |
| non_linear_1.105_variance_limit_5/iter_2  | 0.552    | 1.239      | 0.01     |
| non_linear_1.105_variance_limit_5/iter_3  | 0.552    | 1.246      | 0.02     |
| non_linear_1.105_variance_limit_5/iter_4  | 0.553    | 1.247      | 0.02     |
| non_linear_1.105_variance_limit_5/iter_5  | 0.553    | 1.248      | 0.02     |
| non_linear_1.105_variance_limit_5/iter_6  | 0.553    | 1.248      | 0.02     |
| non_linear_1.105_variance_limit_5/iter_7  | 0.553    | 1.249      | 0.02     |
| non_linear_1.105_variance_limit_5/iter_8  | 0.553    | 1.249      | 0.02     |
| non_linear_1.105_variance_limit_5/iter_9  | 0.553    | 1.249      | 0.02     |
| non_linear_1.105_variance_limit_5/iter_10 | 0.553    | 1.249      | 0.02     |
| non_linear_1.125/iter_1                   | 0.564    | 1.204      | 0.00     |
| non_linear_1.125/iter_2                   | 0.567    | 1.274      | 0.01     |
| non_linear_1.125/iter_3                   | 0.568    | 1.283      | 0.02     |
| non_linear_1.125/iter_4                   | 0.568    | 1.285      | 0.02     |
| non_linear_1.125/iter_5                   | 0.568    | 1.286      | 0.02     |
| non_linear_1.125/iter_6                   | 0.569    | 1.286      | 0.02     |
| non_linear_1.125/iter_7                   | 0.569    | 1.286      | 0.02     |
| non_linear_1.125/iter_8                   | 0.568    | 1.286      | 0.02     |
| non_linear_1.125/iter_9                   | 0.568    | 1.286      | 0.02     |
| non_linear_1.125/iter_10                  | 0.568    | 1.286      | 0.02     |
| non_linear_1.125_variance_limit_5/iter_1  | 0.564    | 1.204      | 0.00     |
| non_linear_1.125_variance_limit_5/iter_2  | 0.568    | 1.274      | 0.01     |
| non_linear_1.125_variance_limit_5/iter_3  | 0.57     | 1.285      | 0.02     |
| non_linear_1.125_variance_limit_5/iter_4  | 0.57     | 1.289      | 0.02     |
| non_linear_1.125_variance_limit_5/iter_5  | 0.571    | 1.291      | 0.02     |
| non_linear_1.125_variance_limit_5/iter_6  | 0.572    | 1.292      | 0.02     |

|                                           |        |       |       |
|-------------------------------------------|--------|-------|-------|
| non_linear_1.125_variance_limit_5/iter_7  | 0.572  | 1.294 | 0.02  |
| non_linear_1.125_variance_limit_5/iter_8  | 0.573  | 1.296 | 0.02  |
| non_linear_1.125_variance_limit_5/iter_9  | 0.5723 | 1.296 | 0.02  |
| non_linear_1.125_variance_limit_5/iter_10 | 0.573  | 1.297 | 0.02  |
| non_linear_1.250/iter_1                   | 0.64   | 1.303 | -0.01 |
| non_linear_1.250/iter_2                   | 0.662  | 1.466 | 0.02  |
| non_linear_1.250/iter_3                   | 0.669  | 1.506 | 0.02  |
| non_linear_1.250/iter_4                   | 0.67   | 1.518 | 0.02  |
| non_linear_1.250/iter_5                   | 0.671  | 1.523 | 0.02  |
| non_linear_1.250/iter_6                   | 0.672  | 1.525 | 0.02  |
| non_linear_1.250/iter_7                   | 0.673  | 1.526 | 0.02  |
| non_linear_1.250/iter_8                   | 0.673  | 1.527 | 0.02  |
| non_linear_1.250/iter_9                   | 0.673  | 1.527 | 0.02  |
| non_linear_1.250/iter_10                  | 0.673  | 1.528 | 0.02  |
| non_linear_1.250_variance_limit_5/iter_1  | 0.640  | 1.303 | -0.01 |
| non_linear_1.250_variance_limit_5/iter_2  | 0.668  | 1.472 | 0.01  |
| non_linear_1.250_variance_limit_5/iter_3  | 0.687  | 1.532 | 0.02  |
| non_linear_1.250_variance_limit_5/iter_4  | 0.693  | 1.563 | 0.02  |
| non_linear_1.250_variance_limit_5/iter_5  | 0.693  | 1.569 | 0.03  |
| non_linear_1.250_variance_limit_5/iter_6  | 0.692  | 1.571 | 0.03  |
| non_linear_1.250_variance_limit_5/iter_7  | 0.691  | 1.568 | 0.03  |
| non_linear_1.250_variance_limit_5/iter_8  | 0.690  | 1.565 | 0.03  |
| non_linear_1.250_variance_limit_5/iter_9  | 0.689  | 1.562 | 0.03  |
| non_linear_1.250_variance_limit_5/iter_10 | 0.688  | 1.561 | 0.03  |
| quadratic_sliding_variance_20/iter_1      | 0.472  | 1.046 | 0.01  |
| quadratic_sliding_variance_20/iter_2      | 0.765  | 1.644 | 0.02  |
| quadratic_sliding_variance_20/iter_3      | NA     | NA    | NA    |
| quadratic_sliding_variance_50/iter_1      | 0.472  | 1.046 | 0.13  |
| quadratic_sliding_variance_50/iter_2      | 0.674  | 1.377 | 0.38  |
| quadratic_sliding_variance_50/iter_3      | 0.748  | 1.318 | 0.35  |
| quadratic_sliding_variance_150/iter_1     | 0.472  | 1.046 | 0.11  |
| quadratic_sliding_variance_150/iter_2     | 0.598  | 1.146 | 0.31  |
| quadratic_sliding_variance_150/iter_3     | 0.646  | 1.032 | 0.11  |
| quadratic/iter_1                          | 0.472  | 1.046 | 0.10  |
| quadratic/iter_2                          | 0.937  | 1.678 | 0.61  |
| quadratic/iter_3                          | 0.982  | 1.438 | 0.90  |

---

**Supplementary Material 2.** Value of accuracy, dispersion and bias divided by the genetic standard deviations (bias\_std) for EUROP. Models presented are pedigree BLUP (PBLUP), single-step genomic BLUP (ssGBLUP), and different weighting single step, described as follows: non\_linear refers to the nonlinear weighting strategies presented in the manuscript with the respective CT value, and limit\_5 refers to when variance was set up to a maximum of 5. Quadratic refers to the quadratic weight applied to the SNP solutions, and sliding stands for the quadratic weight applied to a window of sliding SNPs. iter stands for the number of iterations, and NA values mean that it was not possible to obtain the solution due to a blending problem between  $A^{-1}$  and  $G^{-1}$ .

| Models                                    | Accuracy | Dispersion | Bias_std |
|-------------------------------------------|----------|------------|----------|
| Pblup                                     | 0.509    | 0.910      | -0.009   |
| ssGBLUP                                   | 0.597    | 1.051      | 0.010    |
| non_linear_1.105/iter_1                   | 0.653    | 0.959      | 0.004    |
| non_linear_1.105/iter_2                   | 0.650    | 0.992      | 0.010    |
| non_linear_1.105/iter_3                   | 0.650    | 0.995      | 0.011    |
| non_linear_1.105/iter_4                   | 0.650    | 0.996      | 0.011    |
| non_linear_1.105/iter_5                   | 0.650    | 0.996      | 0.011    |
| non_linear_1.105/iter_6                   | 0.650    | 0.996      | 0.011    |
| non_linear_1.105/iter_7                   | 0.650    | 0.996      | 0.011    |
| non_linear_1.105/iter_8                   | 0.650    | 0.996      | 0.011    |
| non_linear_1.105/iter_9                   | 0.650    | 0.996      | 0.011    |
| non_linear_1.105/iter_10                  | 0.650    | 0.996      | 0.011    |
| non_linear_1.105_variance_limit_5/iter_1  | 0.653    | 0.959      | 0.004    |
| non_linear_1.105_variance_limit_5/iter_2  | 0.651    | 0.992      | 0.010    |
| non_linear_1.105_variance_limit_5/iter_3  | 0.651    | 0.997      | 0.011    |
| non_linear_1.105_variance_limit_5/iter_4  | 0.651    | 0.998      | 0.011    |
| non_linear_1.105_variance_limit_5/iter_5  | 0.651    | 0.998      | 0.011    |
| non_linear_1.105_variance_limit_5/iter_6  | 0.652    | 0.999      | 0.011    |
| non_linear_1.105_variance_limit_5/iter_7  | 0.652    | 0.999      | 0.011    |
| non_linear_1.105_variance_limit_5/iter_8  | 0.652    | 1.000      | 0.011    |
| non_linear_1.105_variance_limit_5/iter_9  | 0.652    | 1.000      | 0.011    |
| non_linear_1.105_variance_limit_5/iter_10 | 0.652    | 1.000      | 0.011    |
| non_linear_1.125/iter_1                   | 0.663    | 0.968      | 0.003    |
| non_linear_1.125/iter_2                   | 0.661    | 1.009      | 0.010    |
| non_linear_1.125/iter_3                   | 0.661    | 1.014      | 0.011    |
| non_linear_1.125/iter_4                   | 0.661    | 1.015      | 0.012    |
| non_linear_1.125/iter_5                   | 0.661    | 1.016      | 0.012    |
| non_linear_1.125/iter_6                   | 0.661    | 1.016      | 0.012    |
| non_linear_1.125/iter_7                   | 0.661    | 1.016      | 0.012    |
| non_linear_1.125/iter_8                   | 0.661    | 1.016      | 0.012    |
| non_linear_1.125/iter_9                   | 0.661    | 1.016      | 0.012    |
| non_linear_1.125/iter_10                  | 0.661    | 1.016      | 0.012    |
| non_linear_1.125_variance_limit_5/iter_1  | 0.663    | 0.968      | 0.003    |
| non_linear_1.125_variance_limit_5/iter_2  | 0.662    | 1.010      | 0.010    |
| non_linear_1.125_variance_limit_5/iter_3  | 0.663    | 1.017      | 0.011    |
| non_linear_1.125_variance_limit_5/iter_4  | 0.663    | 1.020      | 0.012    |
| non_linear_1.125_variance_limit_5/iter_5  | 0.664    | 1.022      | 0.012    |
| non_linear_1.125_variance_limit_5/iter_6  | 0.664    | 1.023      | 0.012    |

|                                           |       |       |        |
|-------------------------------------------|-------|-------|--------|
| non_linear_1.125_variance_limit_5/iter_7  | 0.665 | 1.024 | 0.012  |
| non_linear_1.125_variance_limit_5/iter_8  | 0.666 | 1.025 | 0.012  |
| non_linear_1.125_variance_limit_5/iter_9  | 0.666 | 1.026 | 0.012  |
| non_linear_1.125_variance_limit_5/iter_10 | 0.666 | 1.027 | 0.011  |
| non_linear_1.250/iter_1                   | 0.717 | 1.012 | -0.004 |
| non_linear_1.250/iter_2                   | 0.727 | 1.105 | 0.008  |
| non_linear_1.250/iter_3                   | 0.729 | 1.127 | 0.012  |
| non_linear_1.250/iter_4                   | 0.730 | 1.133 | 0.013  |
| non_linear_1.250/iter_5                   | 0.731 | 1.135 | 0.013  |
| non_linear_1.250/iter_6                   | 0.731 | 1.136 | 0.014  |
| non_linear_1.250/iter_7                   | 0.731 | 1.137 | 0.014  |
| non_linear_1.250/iter_8                   | 0.731 | 1.137 | 0.014  |
| non_linear_1.250/iter_9                   | 0.731 | 1.137 | 0.014  |
| non_linear_1.250/iter_10                  | 0.732 | 1.137 | 0.014  |
| non_linear_1.250_variance_limit_5/iter_1  | 0.717 | 1.012 | -0.004 |
| non_linear_1.250_variance_limit_5/iter_2  | 0.733 | 1.112 | 0.008  |
| non_linear_1.250_variance_limit_5/iter_3  | 0.747 | 1.147 | 0.010  |
| non_linear_1.250_variance_limit_5/iter_4  | 0.749 | 1.162 | 0.014  |
| non_linear_1.250_variance_limit_5/iter_5  | 0.749 | 1.165 | 0.013  |
| non_linear_1.250_variance_limit_5/iter_6  | 0.750 | 1.165 | 0.014  |
| non_linear_1.250_variance_limit_5/iter_7  | 0.750 | 1.165 | 0.014  |
| non_linear_1.250_variance_limit_5/iter_8  | 0.749 | 1.165 | 0.014  |
| non_linear_1.250_variance_limit_5/iter_9  | 0.749 | 1.164 | 0.014  |
| non_linear_1.250_variance_limit_5/iter_10 | 0.749 | 1.164 | 0.014  |
| quadratic_sliding_variance_20/iter_1      | 0.575 | 4.962 | 0.809  |
| quadratic_sliding_variance_20/iter_2      | 0.773 | 6.742 | 0.845  |
| quadratic_sliding_variance_20/iter_3      | 0.825 | 6.665 | 0.848  |
| quadratic_sliding_variance_50/iter_1      | 0.575 | 4.962 | 0.809  |
| quadratic_sliding_variance_50/iter_2      | 0.716 | 6.151 | 0.836  |
| quadratic_sliding_variance_50/iter_3      | 0.771 | 5.675 | 0.839  |
| quadratic_sliding_variance_150/iter_1     | 0.575 | 4.962 | 0.809  |
| quadratic_sliding_variance_150/iter_2     | 0.680 | 5.387 | 0.849  |
| quadratic_sliding_variance_150/iter_3     | 0.747 | 4.796 | 0.893  |
| quadratic/iter_1                          | 0.575 | 4.962 | 0.809  |
| quadratic/iter_2                          | 0.916 | 7.604 | 0.888  |
| quadratic/iter_3                          | 0.961 | 6.975 | 0.941  |

---

**Supplementary Material 3.** Value of accuracy, dispersion and bias divided by the genetic standard deviations (bias\_std) for dressing percentage (DP). Models presented are pedigree BLUP (PBLUP), single-step genomic BLUP (ssGBLUP), and different weighting single step, described as follows: non\_linear refers to the nonlinear weighting strategies presented in the manuscript with the respective CT value, limit\_5 refers to when variance was set up to a maximum of 5. Quadratic refers to the quadratic weight applied to the SNP solutions, and sliding stands for the quadratic weight applied to a window of sliding SNPs. iter stands for the number of iterations, and NA values mean that it was not possible to obtain the solution due to a blending problem between  $A^{-1}$  and  $G^{-1}$

| Models                                    | Accuracy | Dispersion | Bias_std |
|-------------------------------------------|----------|------------|----------|
| Pblup                                     | 0.463    | 1.115      | -0.002   |
| ssGBLUP                                   | 0.528    | 1.057      | 0.002    |
| non_linear_1.105/iter_1                   | 0.600    | 1.156      | 0.016    |
| non_linear_1.105/iter_2                   | 0.600    | 1.200      | 0.022    |
| non_linear_1.105/iter_3                   | 0.600    | 1.205      | 0.023    |
| non_linear_1.105/iter_4                   | 0.600    | 1.206      | 0.023    |
| non_linear_1.105/iter_5                   | 0.600    | 1.206      | 0.023    |
| non_linear_1.105/iter_6                   | 0.600    | 1.206      | 0.023    |
| non_linear_1.105/iter_7                   | 0.600    | 1.206      | 0.023    |
| non_linear_1.105/iter_8                   | 0.600    | 1.206      | 0.023    |
| non_linear_1.105/iter_9                   | 0.600    | 1.206      | 0.023    |
| non_linear_1.105/iter_10                  | 0.600    | 1.206      | 0.023    |
| non_linear_1.105_variance_limit_5/iter_1  | 0.600    | 1.167      | 0.016    |
| non_linear_1.105_variance_limit_5/iter_2  | 0.600    | 1.212      | 0.022    |
| non_linear_1.105_variance_limit_5/iter_3  | 0.601    | 1.218      | 0.023    |
| non_linear_1.105_variance_limit_5/iter_4  | 0.602    | 1.220      | 0.023    |
| non_linear_1.105_variance_limit_5/iter_5  | 0.602    | 1.222      | 0.023    |
| non_linear_1.105_variance_limit_5/iter_6  | 0.603    | 1.223      | 0.023    |
| non_linear_1.105_variance_limit_5/iter_7  | 0.602    | 1.223      | 0.023    |
| non_linear_1.105_variance_limit_5/iter_8  | 0.602    | 1.223      | 0.023    |
| non_linear_1.105_variance_limit_5/iter_9  | 0.603    | 1.223      | 0.023    |
| non_linear_1.105_variance_limit_5/iter_10 | 0.603    | 1.223      | 0.023    |
| non_linear_1.125/iter_1                   | 0.613    | 1.173      | 0.016    |
| non_linear_1.125/iter_2                   | 0.614    | 1.228      | 0.022    |
| non_linear_1.125/iter_3                   | 0.614    | 1.235      | 0.023    |
| non_linear_1.125/iter_4                   | 0.615    | 1.237      | 0.023    |
| non_linear_1.125/iter_5                   | 0.615    | 1.237      | 0.023    |
| non_linear_1.125/iter_6                   | 0.615    | 1.237      | 0.023    |
| non_linear_1.125/iter_7                   | 0.615    | 1.238      | 0.023    |
| non_linear_1.125/iter_8                   | 0.615    | 1.238      | 0.023    |
| non_linear_1.125/iter_9                   | 0.615    | 1.238      | 0.023    |
| non_linear_1.125/iter_10                  | 0.615    | 1.238      | 0.023    |
| non_linear_1.125_variance_limit_5/iter_1  | 0.613    | 1.184      | 0.016    |
| non_linear_1.125_variance_limit_5/iter_2  | 0.615    | 1.241      | 0.022    |
| non_linear_1.125_variance_limit_5/iter_3  | 0.616    | 1.250      | 0.023    |
| non_linear_1.125_variance_limit_5/iter_4  | 0.618    | 1.255      | 0.023    |
| non_linear_1.125_variance_limit_5/iter_5  | 0.618    | 1.256      | 0.023    |
| non_linear_1.125_variance_limit_5/iter_6  | 0.619    | 1.257      | 0.023    |

|                                           |       |       |        |
|-------------------------------------------|-------|-------|--------|
| non_linear_1.125_variance_limit_5/iter_7  | 0.619 | 1.259 | 0.023  |
| non_linear_1.125_variance_limit_5/iter_8  | 0.619 | 1.260 | 0.023  |
| non_linear_1.125_variance_limit_5/iter_9  | 0.620 | 1.260 | 0.023  |
| non_linear_1.125_variance_limit_5/iter_10 | 0.620 | 1.261 | 0.023  |
| non_linear_1.250/iter_1                   | 0.681 | 1.252 | 0.011  |
| non_linear_1.250/iter_2                   | 0.699 | 1.378 | 0.022  |
| non_linear_1.250/iter_3                   | 0.703 | 1.408 | 0.024  |
| non_linear_1.250/iter_4                   | 0.704 | 1.416 | 0.025  |
| non_linear_1.250/iter_5                   | 0.705 | 1.419 | 0.025  |
| non_linear_1.250/iter_6                   | 0.706 | 1.421 | 0.025  |
| non_linear_1.250/iter_7                   | 0.706 | 1.421 | 0.025  |
| non_linear_1.250/iter_8                   | 0.706 | 1.422 | 0.025  |
| non_linear_1.250/iter_9                   | 0.706 | 1.422 | 0.025  |
| non_linear_1.250/iter_10                  | 0.706 | 1.422 | 0.025  |
| non_linear_1.250_variance_limit_5/iter_1  | 0.681 | 1.264 | 0.011  |
| non_linear_1.250_variance_limit_5/iter_2  | 0.705 | 1.397 | 0.021  |
| non_linear_1.250_variance_limit_5/iter_3  | 0.722 | 1.443 | 0.022  |
| non_linear_1.250_variance_limit_5/iter_4  | 0.727 | 1.468 | 0.024  |
| non_linear_1.250_variance_limit_5/iter_5  | 0.726 | 1.473 | 0.026  |
| non_linear_1.250_variance_limit_5/iter_6  | 0.725 | 1.472 | 0.025  |
| non_linear_1.250_variance_limit_5/iter_7  | 0.724 | 1.470 | 0.025  |
| non_linear_1.250_variance_limit_5/iter_8  | 0.723 | 1.467 | 0.025  |
| non_linear_1.250_variance_limit_5/iter_9  | 0.723 | 1.466 | 0.025  |
| non_linear_1.250_variance_limit_5/iter_10 | 0.723 | 1.465 | 0.025  |
| quadratic_sliding_variance_20/iter_1      | 0.416 | 5.097 | -5.370 |
| quadratic_sliding_variance_20/iter_2      | 0.494 | 5.405 | -5.432 |
| quadratic_sliding_variance_20/iter_3      | 0.536 | 5.910 | -4.796 |
| quadratic_sliding_variance_50/iter_1      | 0.416 | 5.097 | -5.370 |
| quadratic_sliding_variance_50/iter_2      | 0.458 | 5.248 | -5.107 |
| quadratic_sliding_variance_50/iter_3      | 0.474 | 5.302 | -4.174 |
| quadratic_sliding_variance_150/iter_1     | 0.416 | 5.097 | -5.370 |
| quadratic_sliding_variance_150/iter_2     | 0.459 | 5.485 | -4.698 |
| quadratic_sliding_variance_150/iter_3     | 0.494 | 6.073 | -4.109 |
| quadratic/iter_1                          | 0.416 | 5.097 | -5.370 |
| quadratic/iter_2                          | 0.673 | 6.001 | -5.533 |
| quadratic/iter_3                          | 0.80  | 6.495 | -5.210 |

---
